# Supplementary material for: The metabolic disturbances of isoproterenol induced myocardial infarction in rats based on a tissue targeted metabonomics
Source: Royal Society of Chemistry journal article supplement (doi:10.1039/c3mb70222g), 2013-08-16
Supplement: c3mb70222g.pdf [file c3mb70222g.pdf]

## Supporting information

Table S1. Stability (A) and Repeatability (B) of UPLC-Q-TOF/MS method

A:

| NO. | Positive mode |         |            |         | NO. | Negative mode |         |            |         |
|-----|---------------|---------|------------|---------|-----|---------------|---------|------------|---------|
|     | RT (min)      | RSD (%) | <i>m/z</i> | RSD (%) |     | RT (min)      | RSD (%) | <i>m/z</i> | RSD (%) |
| 1   | 0.63          | 0.8413  | 229.1522   | 0.0005  | 11  | 0.59          | 0.4237  | 267.0722   | 0.0004  |
| 2   | 2.52          | 0.2024  | 218.2117   | 0.0003  | 12  | 2.18          | 0.1972  | 201.0223   | 0.0002  |
| 3   | 2.60          | 0.1308  | 260.2384   | 0.0006  | 13  | 4.82          | 0.0726  | 265.1481   | 0.0008  |
| 4   | 4.36          | 0.0849  | 318.3002   | 0.0004  | 14  | 5.52          | 0.0507  | 524.2751   | 0.0002  |
| 5   | 5.20          | 0.0500  | 302.3044   | 0.0001  | 15  | 6.01          | 0.0749  | 540.3306   | 0.0005  |
| 6   | 5.53          | 0.0886  | 544.3409   | 0.0002  | 16  | 6.37          | 0.0644  | 485.2828   | 0.0003  |
| 7   | 5.94          | 0.0286  | 496.3391   | 0.0003  | 17  | 7.04          | 0.0526  | 568.3621   | 0.0005  |
| 8   | 6.93          | 0.0620  | 524.3715   | 0.0007  | 18  | 7.54          | 0.0371  | 327.2371   | 0.0006  |
| 9   | 7.55          | 0.0331  | 637.3090   | 0.0003  | 19  | 7.71          | 0.0220  | 303.2316   | 0.0009  |
| 10  | 8.79          | 0.8413  | 621.3092   | 0.0002  | 20  | 8.78          | 0.0353  | 423.3271   | 0.0003  |

B:

| NO. | Positive mode |         |            |         | NO. | Negative mode |         |            |         |
|-----|---------------|---------|------------|---------|-----|---------------|---------|------------|---------|
|     | RT (min)      | RSD (%) | <i>m/z</i> | RSD (%) |     | RT (min)      | RSD (%) | <i>m/z</i> | RSD (%) |
| 1   | 0.63          | 0.3651  | 229.1522   | 0.0003  | 11  | 0.59          | 0.7966  | 267.0722   | 0.0021  |
| 2   | 2.52          | 0.1825  | 218.2117   | 0.0003  | 12  | 2.18          | 0.2569  | 201.0223   | 0.0005  |
| 3   | 2.60          | 0.1500  | 260.2384   | 0.0005  | 13  | 4.82          | 0.0934  | 265.1481   | 0.0006  |
| 4   | 4.36          | 0.0872  | 318.3002   | 0.0003  | 14  | 5.52          | 0.0417  | 524.2751   | 0.0008  |
| 5   | 5.20          | 0.0653  | 302.3044   | 0.0004  | 15  | 6.01          | 0.0549  | 540.3306   | 0.0010  |
| 6   | 5.53          | 0.0759  | 544.3409   | 0.0008  | 16  | 6.37          | 0.0738  | 485.2828   | 0.0010  |
| 7   | 5.94          | 0.0471  | 496.3391   | 0.0010  | 17  | 7.04          | 0.0497  | 568.3621   | 0.0005  |
| 8   | 6.93          | 0.0880  | 524.3715   | 0.0007  | 18  | 7.54          | 0.0531  | 327.2371   | 0.0010  |
| 9   | 7.55          | 0.0265  | 637.3090   | 0.0006  | 19  | 7.71          | 0.0298  | 303.2316   | 0.0004  |
| 10  | 8.79          | 0.0432  | 621.3092   | 0.0013  | 20  | 8.78          | 0.0330  | 423.3271   | 0.0003  |

Table S2. Reproducibility of the extraction process based on UPLC-Q/TOF MS and  $^1\text{H}$  NMR.

| UPLC-Q-TOF/MS |          |          |         |               |          |          |         | $^1\text{H}$ NMR |                                           |         |
|---------------|----------|----------|---------|---------------|----------|----------|---------|------------------|-------------------------------------------|---------|
| Positive mode |          |          |         | Negative mode |          |          |         | NO.              | $\delta^1\text{H}$ (ppm) and multiplicity | RSD (%) |
| NO.           | RT (min) | $m/z$    | RSD (%) | NO.           | RT (min) | $m/z$    | RSD (%) |                  |                                           |         |
| 1             | 0.63     | 229.1522 | 2.3504  | 11            | 0.59     | 267.0722 | 11.4560 | 1                | 8.72 (dd)                                 | 10.5486 |
| 2             | 2.52     | 218.2117 | 6.0373  | 12            | 2.18     | 201.0223 | 8.5678  | 2                | 6.12 (d)                                  | 6.3553  |
| 3             | 2.60     | 260.2384 | 5.9340  | 13            | 4.82     | 265.1481 | 7.4356  | 3                | 4.465 (t)                                 | 7.9504  |
| 4             | 4.36     | 318.3002 | 4.3323  | 14            | 5.52     | 524.2751 | 3.4561  | 4                | 4.06 (s)                                  | 2.6738  |
| 5             | 5.20     | 302.3044 | 8.8344  | 15            | 6.01     | 540.3306 | 6.3427  | 5                | 2.99 (s)                                  | 9.5614  |
| 6             | 5.53     | 544.3409 | 11.4567 | 16            | 6.37     | 485.2828 | 9.1347  | 6                | 2.29 (d)                                  | 5.9702  |
| 7             | 5.94     | 496.3391 | 6.3527  | 17            | 7.04     | 568.3621 | 5.3467  | 7                | 2.07 (m)                                  | 3.2358  |
| 8             | 6.93     | 524.3715 | 4.3257  | 18            | 7.54     | 327.2371 | 6.8214  | 8                | 1.93 (s)                                  | 3.1454  |
| 9             | 7.55     | 637.3090 | 9.2347  | 19            | 7.71     | 303.2316 | 10.4672 | 9                | 1.88 (s)                                  | 5.7524  |
| 10            | 8.79     | 621.3092 | 5.2305  | 20            | 8.78     | 423.3271 | 8.3567  | 10               | 0.82 (m)                                  | 8.9037  |
